# Supplementary material for: Impact of an Oral Health Education Intervention on Informal Caregivers: Validation and Application of the Portuguese Dental Coping Beliefs Scale - DCBS-PT
Source: Research Square preprint supplement (doi:10.21203/rs.3.rs-8451681/v1), 2026-01-19
Supplement: Supplementary file 1 [file 5edb9356f388e733f77a956d.pdf]

**CONSENTIMENTO INFORMADO, LIVRE E ESCLARECIDO PARA PARTICIPAÇÃO EM INVESTIGAÇÃO  
de acordo com a Declaração de Helsínquia <sup>1</sup> e a Convenção de Oviedo <sup>2</sup>**

*Por favor, leia com atenção a seguinte informação. Se achar que algo está incorreto ou não está claro, não hesite em solicitar mais informações. Se concorda com a proposta que lhe foi feita, queira assinar este documento.*

**Título do estudo:** Caracterização dos cuidados de saúde oral aplicados por cuidadores institucionais.

**Enquadramento:** O envelhecimento da população tem vindo a ser um grande desafio para a sociedade, pois estabelece-se o objetivo do individuo ter uma esperança media de vida superior, mas mantendo níveis satisfatórios de qualidade de vida. A mesma situação é colocada perante indivíduos com deficiência e que necessitam de cuidados especiais a todos os níveis, nomeadamente, da sua saúde oral. A combinação do envelhecimento e a deficiência física e mental, cria a necessidade de uma maior especialização dos seus cuidadores, nomeadamente os que se encontram institucionalizados. Assim, é fundamental avaliar os conhecimentos e as capacidades que os cuidadores apresentam na prestação de cuidados de saúde oral junto dos seus pacientes dependentes. Apenas assim será possível desenvolver *guidelines* e definir estratégias no sentido de capacitação dos cuidadores ao nível da literacia em saúde oral.

**Explicação do estudo:** Com este estudo pretende-se caracterizar a perceção da saúde oral dos utentes institucionalizados que os cuidadores institucionais tratam no seu dia-a-dia através da aplicação de um questionário sobre questões relacionados com o tema proposto e que inclui uma escala denominada “*Dental Coping Beliefs Scale*”, que será validado para a população portuguesa através do presente estudo. Este estudo também apresenta como objetivo definir as estratégias mais indicadas para resolução dos problemas orais dessa população. A participação neste estudo é voluntária, ou seja, só participa no estudo se quiser, e não há nenhum prejuízo se não tiver interesse em participar. Mesmo tendo consentido em participar no presente estudo e tendo respondido às questões feitas, pode sempre e a qualquer momento, pedir para ser retirado do estudo, e que os seus dados não sejam usados. Para tal deve contactar o investigador através do número de telefone ou email no fim deste documento. Deve ainda perguntar e esclarecer qualquer assunto que não tenha ficado claro com o observador.

**Condições e financiamento:** O presente estudo não beneficia de qualquer tipo de financiamento ou conflitos de interesse.

**Confidencialidade e anonimato:** Os dados são recolhidos garantindo a confidencialidade e anonimato e utilizados exclusivamente pelos investigadores envolvidos no projeto. Todos os participantes serão identificados por um código numérico apenas, não havendo a associação dos dados recolhidos com o respetivo sujeito do estudo. Para o tratamento estatístico dos dados, irá manter-se o pressuposto de codificação por forma a garantir a continuidade do processo de anonimização dos dados recolhidos. O participante no estudo poderá retirar o seu consentimento em qualquer etapa do estudo, sem necessidade de facultar explicações aos seus responsáveis, e com a total ausência de prejuízos, assistenciais ou outros, caso não queira participar e podendo ter acesso e correção aos dados recolhidos pelo participante. O período de recolha de dados será de 1 ano, sendo o período para a guarda da informação recolhida de 5 anos. A análise dos dados será efetuada em ambiente que garanta a total privacidade dos mesmos.

Contato: nveiga@ucp.pt, +351 966454933

Viseu, 16 de dezembro de 2022

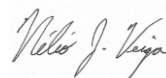

Nélcio Jorge Veiga (Investigador Principal)

**Data Protection Officer – UCP:**

Dra. Frederica Campos de Carvalho Contacto telefónico: +351 217214179

E-mail: [compliance.rgpd@ucp.pt](mailto:compliance.rgpd@ucp.pt)

**Consentimento informado**

Declaro ter lido e compreendido este documento, bem como as informações verbais que me foram fornecidas pela pessoa que acima assina. Foi-me garantida a possibilidade de, em qualquer altura, recusar participar neste estudo sem qualquer tipo de consequências. Desta forma, aceito participar neste estudo e permito que os dados recolhidos sejam divulgados sob forma de publicação científica, desde que a minha identidade seja mantida confidencial.

SE NÃO FOR O PRÓPRIO A ASSINAR POR INCAPACIDADE

NOME: \_\_\_\_\_

BI/CC Nº: \_\_\_\_\_ DATA OU VALIDADE: \_\_\_\_/\_\_\_\_/\_\_\_\_

GRAU DE PARENTESCO OU TIPO DE REPRESENTAÇÃO: \_\_\_\_\_

ASSINATURA \_\_\_\_\_

Nome do participante no estudo.

Assinatura: \_\_\_\_\_. Data: \_\_\_\_/\_\_\_\_/\_\_\_\_

Nome do investigador responsável.

Assinatura: \_\_\_\_\_. Data: \_\_\_\_/\_\_\_\_/\_\_\_\_
