# Supplementary material for: Impact of an Oral Health Education Intervention on Informal Caregivers: Validation and Application of the Portuguese Dental Coping Beliefs Scale - DCBS-PT
Source: Research Square preprint supplement (doi:10.21203/rs.3.rs-8451681/v1), 2026-01-19
Supplement: Supplementary file 2 [file c446358e131ca43d1ac147b6.pdf]

## ***Caracterização dos cuidados de saúde oral aplicados por cuidadores institucionais***

A Faculdade de Medicina Dentária da Universidade Católica Portuguesa encontra-se a desenvolver um estudo para a caracterização dos cuidados de saúde oral aplicados aos utentes e idosos institucionalizados. Este estudo ajudará a estabelecer estratégias para a promoção da saúde oral junto dos cuidadores institucionais, permitindo potenciar os cuidados de saúde oral prestados aos seus utentes/idosos.

Para tal, solicitamos a sua colaboração para o preenchimento deste questionário. O questionário deve ser preenchido individualmente. As respostas são confidenciais, servindo apenas para tratamento estatístico, pelo que não deve assinar nem rubricar o questionário. Para que seja salvaguardada a validade do questionário, pedimos que responda a todas as questões.

1. **Género:** ☐ Feminino ☐ Masculino

2. **Data de Nascimento:** \_\_\_\_/\_\_\_\_/\_\_\_\_, \_\_\_\_ anos.

3. **Área de residência:** ☐ Aldeia ☐ Vila ☐ Cidade

4. **Habilitações literárias:**

|                             |                          |
|-----------------------------|--------------------------|
| Básico                      | <input type="checkbox"/> |
| Secundário                  | <input type="checkbox"/> |
| Ensino Profissional/Técnico | <input type="checkbox"/> |
| Ensino Superior             | <input type="checkbox"/> |

5. **Qual a instituição para que trabalha?**

\_\_\_\_\_

6. **Há quanto tempo trabalha como cuidador(a) institucional?**

☐ Menos de 1 ano ☐ 1-5 anos ☐ 6-10 anos ☐ Mais de 10 anos

7. **Possui alguma formação específica na área da saúde?**

☐ Sim ☐ Não

7.1. Se sim, qual a área de formação em saúde que apresenta? \_\_\_\_\_

8. **Possui alguma formação específica em cuidados de saúde oral?**

☐ Sim ☐ Não

**9. Acha que a formação na área da saúde oral é importante no exercício da sua profissão?**

☐ Sim                      ☐ Não

**10. Selecione os métodos de higiene oral aplicado aos seus utentes.**

- ☐ Escovagem com escova de cerdas duras
- ☐ Escovagem com escova de cerdas médias
- ☐ Escovagem com escova de cerdas suaves
- ☐ Escovagem com escova elétrica
- ☐ Escovilhão interdentário
- ☐ Fio/fita dentária
- ☐ Pasta dentífrica fluoretada
- ☐ Higienização com compressa/gaze húmida
- ☐ Colutórios (elixir para bochecho)
- ☐ Bochecho com água
- ☐ Evitar ingerir alimentos ou bebidas depois da última higienização oral noturna
- ☐ Higienização da prótese dentária com recurso a escova
- ☐ Higienização da prótese com recurso a água corrente
- ☐ Remoção da prótese durante a noite
- ☐ Manter a prótese em água num copo de vidro

### *Dental Coping Beliefs Scale - PT*

**Responder com:**

- (a) Concordo totalmente
- (b) Concordo
- (c) Às vezes
- (d) Não concordo
- (e) Discordo totalmente

**1. Acredito que os meus utentes são capazes de reconhecer quando precisam de ajuda com a sua higiene oral.**

☐ Concordo totalmente    ☐ Concordo    ☐ Às Vezes    ☐ Não concordo    ☐ Discordo totalmente

**2. Se escovar e utilizar corretamente o fio dentário, é expectável que tenha menos problemas dentários.**

☐ Concordo totalmente    ☐ Concordo    ☐ Às Vezes    ☐ Não concordo    ☐ Discordo totalmente

**3. Acredito que sei como as doenças orais devem ser tratadas.**

☐ Concordo totalmente    ☐ Concordo    ☐ Às Vezes    ☐ Não concordo    ☐ Discordo totalmente

**4. Acredito que os produtos fluoretados são mais indicados para crianças.**

☐ Concordo totalmente    ☐ Concordo    ☐ Às Vezes    ☐ Não concordo    ☐ Discordo totalmente

**5. Acredito que os dentes devem durar uma vida inteira.**

☐ Concordo totalmente    ☐ Concordo    ☐ Às Vezes    ☐ Não concordo    ☐ Discordo totalmente

**6. Apenas o médico dentista consegue prevenir as cáries dentárias e as doenças gengivais.**

☐ Concordo totalmente    ☐ Concordo    ☐ Às Vezes    ☐ Não concordo    ☐ Discordo totalmente

**7. Acredito que a cárie dentária pode ser prevenida.**

☐ Concordo totalmente    ☐ Concordo    ☐ Às Vezes    ☐ Não concordo    ☐ Discordo totalmente

**8. Se eu tivesse formação em cuidados de saúde oral, eu seria capaz de prestar melhores cuidados de saúde oral.**

☐ Concordo totalmente    ☐ Concordo    ☐ Às Vezes    ☐ Não concordo    ☐ Discordo totalmente

**9. Se os pais tiverem má saúde oral, a escovagem e utilização do fio dentário não irá ajudar.**

☐ Concordo totalmente    ☐ Concordo    ☐ Às Vezes    ☐ Não concordo    ☐ Discordo totalmente

**10. Eu acredito que as próteses dentárias não necessitam de ser removidas durante a noite, a não ser que o utente queira.**

☐ Concordo totalmente    ☐ Concordo    ☐ Às Vezes    ☐ Não concordo    ☐ Discordo totalmente

**11. Acredito que sei utilizar corretamente o fio dentário.**

☐ Concordo totalmente    ☐ Concordo    ☐ Às Vezes    ☐ Não concordo    ☐ Discordo totalmente

**12. É impossível prever e prevenir a maneira que certas doenças e medicações podem prejudicar os dentes.**

☐ Concordo totalmente    ☐ Concordo    ☐ Às Vezes    ☐ Não concordo    ☐ Discordo totalmente

**13. Acredito que o fio dentário pode prevenir doenças gengivais.**

☐ Concordo totalmente    ☐ Concordo    ☐ Às Vezes    ☐ Não concordo    ☐ Discordo totalmente

**14. Acredito que uma vez que a doença gengival esteja instalada, é impossível de controlar.**

☐ Concordo totalmente    ☐ Concordo    ☐ Às Vezes    ☐ Não concordo    ☐ Discordo totalmente

**15. Acredito que sei como prevenir candidíase oral.**

☐ Concordo totalmente    ☐ Concordo    ☐ Às Vezes    ☐ Não concordo    ☐ Discordo totalmente

**16. Acredito que se a gengiva sangra quando utilizamos o fio dentário, devemos parar a sua utilização.**

☐ Concordo totalmente    ☐ Concordo    ☐ Às Vezes    ☐ Não concordo    ☐ Discordo totalmente

**17. Acredito que a perda dentária é uma consequência normal do processo de envelhecimento.**

☐ Concordo totalmente    ☐ Concordo    ☐ Às Vezes    ☐ Não concordo    ☐ Discordo totalmente

**18. Acredito que mesmo que tenhamos bons hábitos de higiene oral, os nossos dentes irão cair, acompanhando o processo de envelhecimento.**

☐ Concordo totalmente   ☐ Concordo   ☐ Às Vezes   ☐ Não concordo   ☐ Discordo totalmente

**19. Acredito que os meus utentes requerem a minha ajuda na sua higiene oral.**

☐ Concordo totalmente   ☐ Concordo   ☐ Às Vezes   ☐ Não concordo   ☐ Discordo totalmente

**20. Acredito que apenas devemos visitar o médico dentista quando há dor.**

☐ Concordo totalmente   ☐ Concordo   ☐ Às Vezes   ☐ Não concordo   ☐ Discordo totalmente

**21. Se soubesse os fatos sobre doenças orais, eu seria capaz de praticar melhores cuidados de saúde oral.**

☐ Concordo totalmente   ☐ Concordo   ☐ Às Vezes   ☐ Não concordo   ☐ Discordo totalmente

**22. Acredito que uma prótese dentária dá menos trabalho a cuidar comparativamente aos dentes naturais.**

☐ Concordo totalmente   ☐ Concordo   ☐ Às Vezes   ☐ Não concordo   ☐ Discordo totalmente

**23. Acredito que sou capaz de remover, com sucesso, a maioria da placa bacteriana por forma a ajudar a prevenir a cárie dentária e doença gengival.**

☐ Concordo totalmente   ☐ Concordo   ☐ Às Vezes   ☐ Não concordo   ☐ Discordo totalmente

**24. Acredito que um método de escovagem seja tão eficaz quanto qualquer outro.**

☐ Concordo totalmente   ☐ Concordo   ☐ Às Vezes   ☐ Não concordo   ☐ Discordo totalmente

**25. Acredito que a doença gengival pode ser prevenida.**

☐ Concordo totalmente   ☐ Concordo   ☐ Às Vezes   ☐ Não concordo   ☐ Discordo totalmente

**26. Acredito que se as gengivas sangrarem aquando da escovagem, isso geralmente significa que devemos parar de escovar.**

☐ Concordo totalmente   ☐ Concordo   ☐ Às Vezes   ☐ Não concordo   ☐ Discordo totalmente

**27. Acredito que os nossos utentes comem melhor se tiverem uma boca saudável e higienizada.**

☐ Concordo totalmente   ☐ Concordo   ☐ Às Vezes   ☐ Não concordo   ☐ Discordo totalmente

**28. Acredito que a escovagem pode prevenir cáries.**

☐

Concordo  
totalmente

☐

Concordo

☐

Às Vezes

☐

Não concordo

☐

Discordo  
totalmente

Constanza GU, Fernando RO, Iris ES, Darinka MS. Oral health practices and beliefs among caregivers of the dependent elderly. Gerodontology. 2012;29:e742-7.

Godoy J, Rosales E, Garrido-Urrutia C, Godoy J, Rosales E, Garrido-Urrutia C. Creencias relacionadas al cuidado de la salud oral en cuidadores de adultos mayores institucionalizados de la ciudad de Antofagasta, Chile, 2019. Odontoestomatologia [Internet]. 2021 Nov 26 [cited 2022 Oct 12];38(38). Available from: <https://odon.edu.uy/ojs/index.php/ode/article/view/366>.
